# Supplementary material
Source: Springer Nature journal article supplement (https://www.springermedizin.de/resource/supplementary/12888_2013_1844_MOESM3_ESM.pdf/9481476)

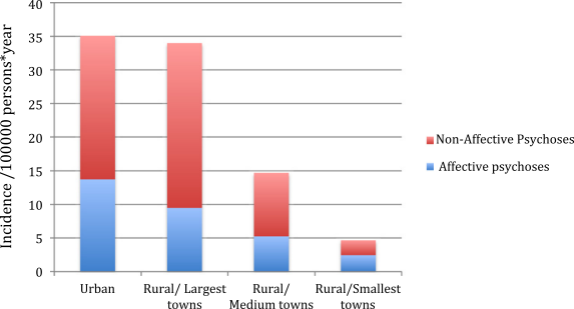

Supplement: MOESM3 [file 9481476]
